# Supplementary material
Source: Springer Nature journal article supplement (https://www.springermedizin.de/resource/supplementary/12974_2009_236_MOESM3_ESM.pdf/9601056)

a

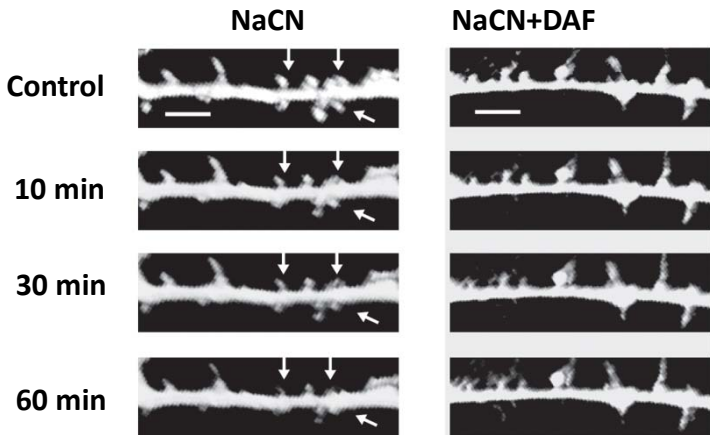

b

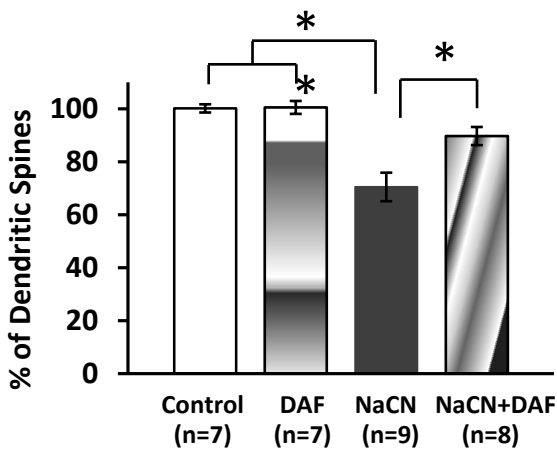

Supplement: MOESM3 [file 9601056]
